# Supplementary material
Source: PubMed Central journal article supplement (PMC5846903)
Supplement: jciinsight-2-95913-s001.pdf [file jciinsight-2-95913-s001.pdf]

### Supplemental Figure 1.

$$\frac{T_{max}}{CMR_{gl}} = \frac{V_d + \frac{\Delta_i}{\Delta_o}}{V_d - \frac{\Delta_i}{\Delta_o}}$$

$$G_i = G_o \frac{\Delta_i}{\Delta_o} - \frac{1}{2} K_T \left( V_d - \frac{\Delta_i}{\Delta_o} \right)$$

Using a previously published reversible Michaelis-Menten model for glucose transport across the human blood-brain barrier (6, 29), it is possible to use our data to derive some estimates of the ratio of maximum rate of blood-brain glucose transport to brain glucose consumption and then, baseline brain glucose levels from our data.  $G_i$  is the calculated brain glucose level,  $G_o$  is the plasma glucose level,  $K_T$  is the Michaelis-Menten half-saturation constant, with a value of 0.6 mM (6) or 1.1 mM (29),  $T_{max}$  is the maximum rate of blood-brain glucose transport,  $CMR_{gl}$  is the brain glucose utilization rate,  $V_d$  is the brain water space (30), and  $\Delta_i$  is the difference between the steady-state brain glucose concentration during the infusion and baseline, and  $\Delta_o$  is the analogous difference for the plasma glucose.

**Supplemental Table 1.** Calculated  $T_{max}/CMR_{glucose}$  using previously published reversible Michaelis-Menten models. ANOVA followed by Fisher's least significant difference (LSD) test for pairwise comparisons, data expressed as mean  $\pm$  SEM

|                            | Lean           | Obese           | T2DM           | P value |               |              |               |
|----------------------------|----------------|-----------------|----------------|---------|---------------|--------------|---------------|
|                            |                |                 |                | ANOVA   | Lean vs Obese | Lean vs T2DM | Obese vs T2DM |
| $\frac{T_{max}}{CMR_{gl}}$ | 1.74 $\pm$ 0.1 | 1.49 $\pm$ 0.03 | 1.40 $\pm$ 0.1 | 0.011   | 0.006         | 0.02         | 0.41          |

**Supplemental Table 2.** Estimated absolute intracerebral glucose concentrations. Estimations derived using previously published reversible Michaelis-Menten models (Model A,  $K_T$  0.6 mM (6); Model B,  $K_T$  1.1 mM (29) for glucose transport across the blood-brain barrier. Calculations presented as mM, mean  $\pm$  SEM.

|       |         | Estimated brain glucose (mM)<br>(at plasma gluc 5 mM) | Estimated Brain glucose (mM)<br>(at plasma gluc 12 mM) |
|-------|---------|-------------------------------------------------------|--------------------------------------------------------|
| Lean  | Model A | 0.8 $\pm$ 0.1                                         | 2.3 $\pm$ 0.2                                          |
|       | Model B | 0.7 $\pm$ 0.1                                         | 2.1 $\pm$ 0.2                                          |
| Obese | Model A | 0.6 $\pm$ 0.05                                        | 1.6 $\pm$ 0.1                                          |
|       | Model B | 0.4 $\pm$ 0.05                                        | 1.5 $\pm$ 0.1                                          |
| T2DM  | Model A | 0.4 $\pm$ 0.1                                         | 1.3 $\pm$ 0.3                                          |
|       | Model B | 0.3 $\pm$ 0.1                                         | 1.4 $\pm$ 0.1                                          |
